# Supplementary material
Source: publisher site journal article supplement (https://www.dovepress.com/article/490210)
Supplement: Supplementary file 1 [file get_supplementary_file.php]

**Supplementary Table S1** Baseline characteristics of all enrolled patients.

| Characteristics | DM(n=47) | ASS(n=16) | IMNM(n=21) | P |
| --- | --- | --- | --- | --- |
| Gender | | | | |
| Female/ Male | 30/17 | 13/3 | 17/4 | 0.266 |
| Age, years | 54.4±15.0 | 55.6±14.7 | 47.8±15.3 | 0.143 |
| Clinical features, n (%) | | | | |
| ILD | 29(61.7) | 12(75.0) | 3(14.3) | <0.001 |
| RP-ILD | 6(12.8) | 0(0) | 0(0) | 0.126  0.003  0.148 |
| Muscle weakness | 27(57.4) | 6(37.5) | 19(90.5) | 0.003  0.148  0.393  0.001  < |
| Myalgia | 21(44.7) | 6(37.5) | 14(66.7) | 0.148 |
| Arthritis/arthralgia | 19(40.4) | 5(31.3) | 5(23.8) | 0.393 |
| Heliotrope rash | 23(48.9) | 4(25) | 1(4.8) | 0.001 |
| Gottron’s papules | 31(66.0) | 5(31.3) | 0(0) | <0.001 |
| Raynaud’ phenomenon | 5(10.6) | 1(6.3) | 0(0) | 0.380 |
| Dysphagia | 14(29.8) | 3(18.8) | 3(14.3) | 0.393 |
| Laboratory features | | | | |
| Albumin, g/L | 33.3±5.7 | 32.8±3.6 | 39.3±4.4 | <0.001 |
| Globulin, g/L | 35.0±8.1 | 33.6±7.4 | 30.9±4.8 | 0.162 |
| CK, U/L | 113.0(66.0,261.0) | 614(95.3,2523.3) | 2181.8±3756.9 | 0.005 |
| LDH, U/L | 344.0(273.3,555.3) | 404.0(304.0,763.5) | 304.5(208.8,879.8) | 0.227 |
| IgG, g/L | 16.6±6.5 | 17.5±9.7 | 13.5±3.7 | 0.225 |
| CRP, mg/L | 10.1(4.1,19.3) | 21.2±20.2 | 3.4(1.0,11.6) | 0.098 |
| ESR, mm/h | 38.7±25.0 | 32.0(21.5,47.0) | 16.0(8.0,28.0) | 0.005 |
| Ferritin, ng/mL | 795.3(489.6,1556.9) a | 658.0(325.2,1470.0) | 306.1±185.7 b | 0.001 |
| IL-6, pg/mL | 15.3(6.6,46.2) c | 11.8(4.1,21.3) d | 9.8±8.0 e | 0.129 |
| Myositis-specific autoantibodies, n | | | | |
| MDA5/TIF1-γ/MI-2/NXP2/SAE | 23/7/7/1/1 | - | - | - |
| JO-1/PL-7/PL-12/HA/OJ/EJ | - | 8/2/1/2/2/1 | - | - |
| SRP/HMGCR | - | - | 11/8 | - |
| Negative | 8 | - | 2 | - |

**Notes:** Data are expressed as n, n (%), mean ± standard deviation, or median (interquartile range).

**Abbreviations:** DM, dermatomyositis; ASS, anti-synthetase syndrome; IMNM, immune-mediated necrotizing myopathy; ILD, interstitial lung disease; RP-ILD, rapidly progressive interstitial lung disease; CK, creatine kinase; LDH, lactate dehydrogenase; IgG, immunoglobulin g; CRP, C-reactive protein; ESR, erythrocyte sedimentation rate; IL-6, interleukin-6; MDA5, melanoma differentiation-associated gene 5; TIF1-γ, transcriptional intermediary factor 1 g; MI-2, complex nucleosome remodeling histone deacetylase; NXP2, nuclear matrix protein 2; SAE, small ubiquitin-like modifier activating enzyme; JO-1, Histidyl-Trna synthetase; PL-7, Threonyl-tRNA synthetase; PL-12, Alanyl-tRNA synthetase; HA, Tyrosyl-tRNA synthetase; OJ, isoleucyl-tRNA synthetase; EJ, Glycyl-tRNA synthetase; SRP, signal recognition particle; HMGCR, 3-hydroxy-3-methylglutaryl coenzyme A reductase; adata available for 34 patients; bdata available for 12 patients; cdata available for 29 patients; ddata available for 11 patients; edata available for 8 patients.
